# Supplementary material for: Genetic analysis and morphological identification of pilus-like structures in members of the genus Bifidobacterium
Source: PubMed Central journal article supplement (PMC3231923; doi:10.1186/1475-2859-10-s1-s16), 2011-08-30
Supplement: 1475-2859-10-S1-S16-S1.pdf [file 1475-2859-10-S1-S16-S1.pdf]

**Supplementary Table 1.** Primers used in RT-PCR experiments.

| Primer   | Sequence (5'-3')     |
|----------|----------------------|
| Pil1_1 f | GGTAAGACCGTGAACGCCTA |
| Pil1_1 r | GCTTTCGTATACGGCTGGAG |
| Pil1_2 f | CTGGTCATTCTCGGTGGAAT |
| Pil1_2 r | CAGGGTAACACCGGACTTGT |
| Pil1_4f  | CCGACGAGCTGCTAAACTTG |
| Pil1_4r  | ACCTCGATCTGGATGACCTG |
| Pil1_5 f | CATACGGCATTGATGGTGAG |
| Pil1_5r  | TAGACCTGCATAGCGGAAGC |
| Pil2_1 f | GGAGACAGCGGTGAAGTCC  |
| Pil2_1 r | GATTTACGCCCGAACTATG  |
| Pil2_2 f | CGACCTTGAATGTGTGTCCA |
| Pil2_2 r | GATGGAGGCATGGACGGTG  |
| Pil2_3 f | CACGAGCAATGAATCGAC   |
| Pil2_3 r | GGCATCGTCGAAGACCATC  |
| Pil2_4 f | ACGTTCTCCACGACCACTTC |
| Pil2_4 r | AGATACTTCTCCGCGAACA  |
| Pil3_1 f | CGTGACTGGCTTGTGTATGG |
| Pil3_1 r | CAGTGTCCACTGTCGTCTCG |
| Pil3_2 f | AGGTGACCAACGTCAAGTCC |
| Pil3_2 r | GTTTCGATCCGTGTCTCCTC |
| Pil3_3 f | GATTTCCGCACTGAAGCAG  |
| Pil3_3 r | TCACGATAAGCATCCCTTCC |
| Pil3_4 f | CGGATCACCATACGGAGTCT |
| Pil3_4 r | GTGACGATGGTGGTGGTGT  |
