# Supplementary material for: Genetic analysis and morphological identification of pilus-like structures in members of the genus Bifidobacterium
Source: PubMed Central journal article supplement (PMC3231923; doi:10.1186/1475-2859-10-s1-s16), 2011-08-30
Supplement: 1475-2859-10-S1-S16-S2.pdf [file 1475-2859-10-S1-S16-S2.pdf]

**Supplementary Table 2.** Primers used in qRT-PCR experiments.

| Primer     | Sequence (5'-3')      | Targeted ORF/gene | Organism                                         |
|------------|-----------------------|-------------------|--------------------------------------------------|
| BLAC1484Fw | CTCCAGCTCAAGAAGGTTGG  | BLAC1484          | <i>B. animalis</i> subsp. <i>lactis</i> DSM10140 |
| BLAC1484Rv | ATGGTCTTCTACTGGACG    | BLAC1484          | <i>B. animalis</i> subsp. <i>lactis</i> DSM10140 |
| BLAC1485Fw | CGGTCATCCAGGTCGATACT  | BLAC1485          | <i>B. animalis</i> subsp. <i>lactis</i> DSM10140 |
| BLAC1485Rv | CACGGTATATGTGCGGTCAG  | BLAC1485          | <i>B. animalis</i> subsp. <i>lactis</i> DSM10140 |
| BLAC1486Fw | GAGAACAAGCTGAGGGATGC  | BLAC1486          | <i>B. animalis</i> subsp. <i>lactis</i> DSM10140 |
| BLAC1486Rv | CGTGGTATATGGGCAGGTTTC | BLAC1486          | <i>B. animalis</i> subsp. <i>lactis</i> DSM10140 |
| BDP0142Fw  | CTCCACTGCGGCACGGTACT  | BDP0142           | <i>B. dentium</i> Bd1                            |
| BDP0142Rv  | TTGCCGATGAGATGCGTGAA  | BDP0142           | <i>B. dentium</i> Bd1                            |
| BDP0143Fw  | TTCCGATTCGGAAGCAACCA  | BDP0143           | <i>B. dentium</i> Bd1                            |
| BDP0143Rv  | CCGTTTCATCAGCGCCATTC  | BDP0143           | <i>B. dentium</i> Bd1                            |
| BDP0144Fw  | GGAAACTTTTCGCCGGCATC  | BDP0144           | <i>B. dentium</i> Bd1                            |
| BDP0144Rv  | TCAGGTTGGCGTGTGTCAGC  | BDP0144           | <i>B. dentium</i> Bd1                            |
| BDP0197Fw  | TCGTCTCCGACGGCTCAATC  | BDP0197           | <i>B. dentium</i> Bd1                            |
| BDP0197Rv  | GGCCATGTTACAGAGGCTTG  | BDP0197           | <i>B. dentium</i> Bd1                            |
| BDP0198Fw  | TCGAAGGTCATCGCCTCGTC  | BDP0198           | <i>B. dentium</i> Bd1                            |
| BDP0198Rv  | CCAACGGGTCGTTGTCGAAC  | BDP0198           | <i>B. dentium</i> Bd1                            |
| BDP0199Fw  | TTCCAGCCGAAATGCGTTGT  | BDP0199           | <i>B. dentium</i> Bd1                            |
| BDP0199Rv  | CAACGTTTGCCGGTCTCACC  | BDP0199           | <i>B. dentium</i> Bd1                            |
| BDP0200Fw  | TCGGCCAGACGCTGTCTTAC  | BDP0200           | <i>B. dentium</i> Bd1                            |
| BDP0200Rv  | CGGAGACCTTGGTGCCATTG  | BDP0200           | <i>B. dentium</i> Bd1                            |
| BDP1999Fw  | TCAAGCTGCCGAACATGCTG  | BDP1999           | <i>B. dentium</i> Bd1                            |
| BDP1999Rv  | CGTTAACCGTCTCGCCATCG  | BDP1999           | <i>B. dentium</i> Bd1                            |
| BDP2000Fw  | TGCCCTGGGTCTTCTTGCTG  | BDP2000           | <i>B. dentium</i> Bd1                            |
| BDP2000Rv  | CCTGCAGAAGCCGCTGAAAA  | BDP2000           | <i>B. dentium</i> Bd1                            |
| BDP2002Fw  | GACACACGATGCCCGAAAC   | BDP2002           | <i>B. dentium</i> Bd1                            |
| BDP2002Rv  | ATCGCATCGGCGTGATTGAT  | BDP2002           | <i>B. dentium</i> Bd1                            |

|               |                          |             |                                   |
|---------------|--------------------------|-------------|-----------------------------------|
| BAD1467Fw     | ACGAGAAGGCTTTGTGCAGT     | BAD1467     | <i>B. adolescentis</i> ATCC 15703 |
| BAD1467Rv     | TGTACGCGGAGTAAGTGTGC     | BAD1467     | <i>B. adolescentis</i> ATCC 15703 |
| BAD1468Fw     | GACCAAGCCAACCAGTTCAT     | BAD1468     | <i>B. adolescentis</i> ATCC 15703 |
| BAD1468Rv     | TTGGTGGCCTTGTAGTAGCC     | BAD1468     | <i>B. adolescentis</i> ATCC 15703 |
| BAD1470Rv     | GTGCAGGTCATCAACGTCAG     | BAD1470     | <i>B. adolescentis</i> ATCC 15703 |
| BAD1470Fw     | TCAAAGTGATGGACGAGACG     | BAD1470     | <i>B. adolescentis</i> ATCC 15703 |
| BBP1707FW     | AACGCGCCACTGTCCTACAA     | BBP1707     | <i>B. bifidum</i> PRL2010         |
| BBP1707RV     | CCCTTGGCCTTGATGTAGCC     | BBP1707     | <i>B. bifidum</i> PRL2010         |
| BBP1708Fw     | CGGATACCGGATCACCATCA     | BBP1708     | <i>B. bifidum</i> PRL2010         |
| BBP1708RV     | GTTTCCTCGTCGTCCTTGG      | BBP1708     | <i>B. bifidum</i> PRL2010         |
| BBP1709Fw     | GGCGGAGAACGAATTGAAGG     | BBP1709     | <i>B. bifidum</i> PRL2010         |
| BBP1709Rv     | AGACGGAACCCTTCGTCTGC     | BBP1709     | <i>B. bifidum</i> PRL2010         |
| BBP1820Fw     | TTGTTGCCGTCTCTTGCACT     | BBP1820     | <i>B. bifidum</i> PRL2010         |
| BBP1820Rv     | GGCTCGATATCCGCAGAGTC     | BBP1820     | <i>B. bifidum</i> PRL2010         |
| BBP1821Fw     | CTGCGACGTTCACTGGTCTC     | BBP1821     | <i>B. bifidum</i> PRL2010         |
| BBP1821 Rv    | TGGTGCTATGAACGCGAACT     | BBP1821     | <i>B. bifidum</i> PRL2010         |
| BBP1822 Fw    | GCACTATGCTCGGTGCTGTC     | BBP1822     | <i>B. bifidum</i> PRL2010         |
| BBP1822 Rv    | ACGACCACATGGCTGATGAC     | BBP1822     | <i>B. bifidum</i> PRL2010         |
| BBP0282Fw     | GCGAACAATGATGGCACCTA     | BBP0282     | <i>B. bifidum</i> PRL2010         |
| BBP0282Rv     | GTCGAACACCACGACGATGT     | BBP0282     | <i>B. bifidum</i> PRL2010         |
| BBP0283Fw     | CACGGTGGAAAACAACCTGA     | BBP0283     | <i>B. bifidum</i> PRL2010         |
| BBP0283 Rv    | GGCGTTGTAGGTGATGGTGA     | BBP0283     | <i>B. bifidum</i> PRL2010         |
| BBP0284Fw     | CCCTAGCGCTCCAATACCAG     | BBP0284     | <i>B. bifidum</i> PRL2010         |
| BBP0284Rv     | CTGGCGAGTTTTGCGTTGTA     | BBP0284     | <i>B. bifidum</i> PRL2010         |
| BD1- rpoB for | AAGACATCATCGCCACCATCAAGT | <i>rpoB</i> | <i>B. dentium</i> Bd1             |
| BD1- rpoB rev | ATATCATCGACATCCACACGCAGA | <i>rpoB</i> | <i>B. dentium</i> Bd1             |
| BD1- atpD rev | GGCCAAGGAACTGCTCGATCTTAC | <i>atpD</i> | <i>B. dentium</i> Bd1             |
| BD1- atpD for | AACAAGGAGCTGCAGGACATCATC | <i>atpD</i> | <i>B. dentium</i> Bd1             |
| BD1- ldh for  | GATTCACCAATCAAGCCACAAAG  | <i>ldh</i>  | <i>B. dentium</i> Bd1             |
| BD1- ldh rev  | ATGTCTTCGAGCAGATCTCACG   | <i>ldh</i>  | <i>B. dentium</i> Bd1             |

---

|              |                          |             |                                                  |
|--------------|--------------------------|-------------|--------------------------------------------------|
| BBP_rpoB for | GTGCAGACCGACAGCTTCGAC    | <i>rpoB</i> | <i>B. bifidum</i> PRL2010                        |
| BBP_rpoB rev | GAGATCTCGTTGAAGAACTCGTC  | <i>rpoB</i> | <i>B. bifidum</i> PRL2010                        |
| BBP_atpD for | CAGAGCCGATCAATGGACGTG    | <i>atpD</i> | <i>B. bifidum</i> PRL2010                        |
| BBP_atpD rev | GTGCTGCTCGACCTCAAGCGTGAT | <i>atpD</i> | <i>B. bifidum</i> PRL2010                        |
| BBP_ldh for  | CACCATGAACAGGAACAAAGTTG  | <i>ldh</i>  | <i>B. bifidum</i> PRL2010                        |
| BBP_ldh rev  | GAATGATCGATGAGTACGAGCTC  | <i>ldh</i>  | <i>B. bifidum</i> PRL2010                        |
| BLA0atpDFw   | CGGCGAGGAAGACAAGACCA     | <i>atpD</i> | <i>B. animalis</i> subsp. <i>lactis</i> DSM10140 |
| BLA0atpDRv   | TCTCCTCCGACGGCACGTAG     | <i>atpD</i> | <i>B. animalis</i> subsp. <i>lactis</i> DSM10140 |
| BLArpoBFw    | GTGGGCGAGCTGATCCAGAA     | <i>rpoB</i> | <i>B. animalis</i> subsp. <i>lactis</i> DSM10140 |
| BLArpoBRv    | GATGAGTGACTGCGGCGTGA     | <i>rpoB</i> | <i>B. animalis</i> subsp. <i>lactis</i> DSM10140 |
| BLAldhFw     | GGCAAGCACTGCACCGAGTT     | <i>ldh</i>  | <i>B. animalis</i> subsp. <i>lactis</i> DSM10140 |
| BLAldhRv     | CCATATTCGCCGGTGAGCAG     | <i>ldh</i>  | <i>B. animalis</i> subsp. <i>lactis</i> DSM10140 |
| BADatpFW     | TCGAAACCGGTATCAAGGTC     | <i>atpD</i> | <i>B. adolescentis</i> ATCC 15703                |
| BADatpRv     | CGCTGAATCATTTCCTGGAT     | <i>atpD</i> | <i>B. adolescentis</i> ATCC 15703                |
| BADldhFW     | CTACTCTCGCTTTCGCTGCT     | <i>ldh</i>  | <i>B. adolescentis</i> ATCC 15703                |
| BADldhRv     | ATGGTCACGGTCGGATAGAA     | <i>ldh</i>  | <i>B. adolescentis</i> ATCC 15703                |
| BADrpoFw     | CTTCTCCGATCCGTACTIONG    | <i>rpoB</i> | <i>B. adolescentis</i> ATCC 15703                |
| BADrpoRv     | CACGGTCTGGGACTTGATTT     | <i>rpoB</i> | <i>B. adolescentis</i> ATCC 15703                |

---
