# Supplementary material for: Genetic analysis and morphological identification of pilus-like structures in members of the genus Bifidobacterium
Source: PubMed Central journal article supplement (PMC3231923; doi:10.1186/1475-2859-10-s1-s16), 2011-08-30

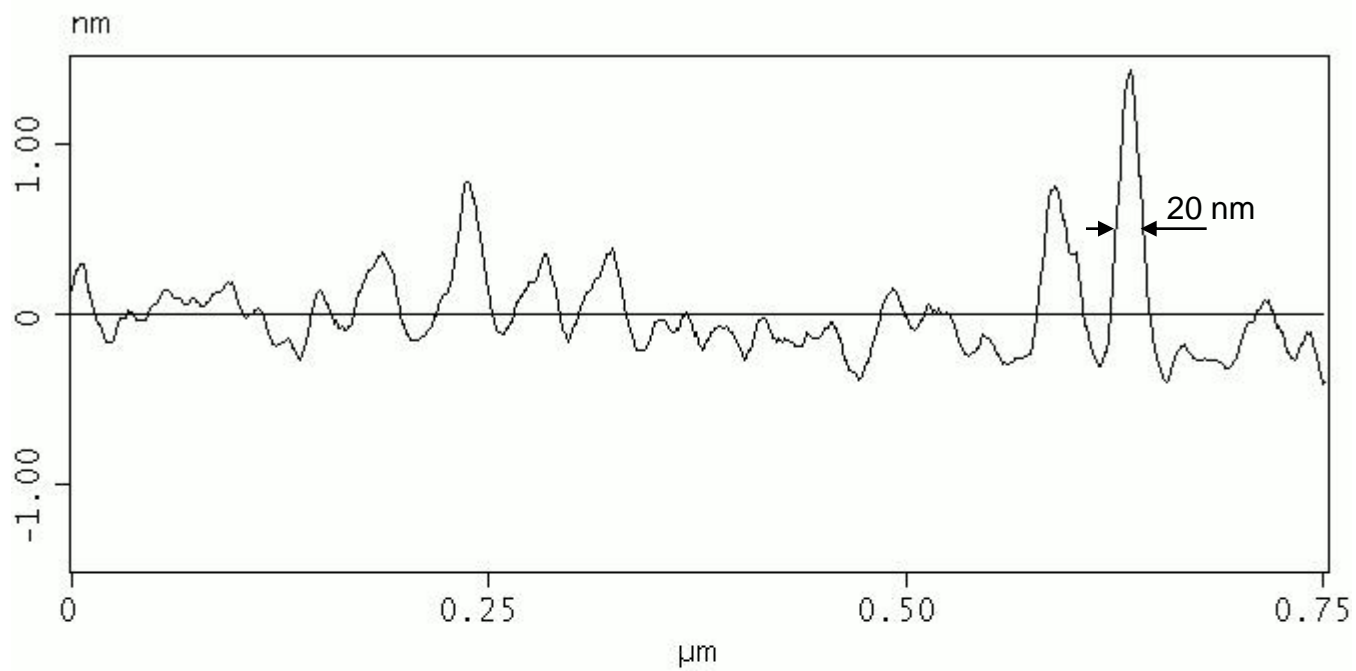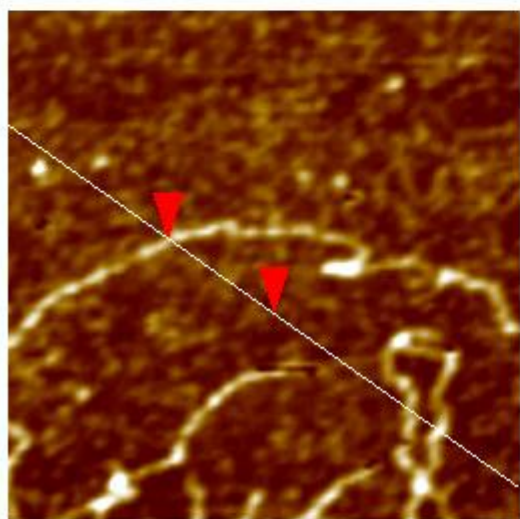

Supplement: 1475-2859-10-S1-S16-S3.pdf [file 1475-2859-10-S1-S16-S3.pdf]
