# Supplementary material for: Genetic analysis and morphological identification of pilus-like structures in members of the genus Bifidobacterium
Source: PubMed Central journal article supplement (PMC3231923; doi:10.1186/1475-2859-10-s1-s16), 2011-08-30
Supplement: 1475-2859-10-S1-S16-S4.pdf [file 1475-2859-10-S1-S16-S4.pdf]

**Supplementary Table 3.** List of the pili-encoding genes used for the phylogenetic analyses .

| Organism                                                                         | Gene function                                             | Accession number |
|----------------------------------------------------------------------------------|-----------------------------------------------------------|------------------|
| <i>Bifidobacterium animalis</i> subsp. <i>lactis</i> DSM 10140                   | Cell surface protein fimA fimbrial subunit                | ACS48397.1       |
| <i>Bifidobacterium animalis</i> subsp. <i>lactis</i> AD011                       | Possible cell surface protein                             | ACL28972.1       |
| <i>Bifidobacterium adolescentis</i> ATCC 15703                                   | Cell surface protein fimA fimbrial subunit                | YP_910330.1      |
| <i>Bifidobacterium dentium</i> Bd1                                               | Cell surface protein                                      | YP_003361571.1   |
| <i>Bifidobacterium dentium</i> Bd1                                               | Surface protein with Cna protein B-type domain            | YP_003360030.1   |
| <i>Bifidobacterium dentium</i> Bd1                                               | Fimbrial subunit-like cell surface protein                | YP_003359706.1   |
| <i>Bifidobacterium bifidum</i> PRL2010                                           | Fimbrial subunit <i>fimA</i>                              | YP_003970445.1   |
| <i>Bifidobacterium dentium</i> Bd1                                               | Cell surface protein                                      | YP_003361281.1   |
| <i>Bifidobacterium dentium</i> Bd1                                               | LPXTG cell wall surface protein,                          | YP_003361282.1   |
| <i>Bifidobacterium longum</i> subsp. <i>longum</i> DJO10A                        | Fimbrial subunit <i>fimA</i>                              | ZP_00121141.2    |
| <i>Bifidobacterium bifidum</i> PRL2010                                           | Cell surface protein                                      | YP_003971869.1   |
| <i>Bifidobacterium longum</i> subsp. <i>longum</i> NCC2705                       | Fimbrial subunit <i>fimA</i>                              | NP_695860.1      |
| <i>Streptococcus sanguinis</i> SK36                                              | <i>fimA</i> fimbrial subunit-like protein, putative       | ABN45021.1       |
| <i>Bifidobacterium dentium</i> Bd1                                               | Sortase-anchored surface protein                          | YP_003359781.1   |
| <i>Bifidobacterium dentium</i> Bd1                                               | Fimbrial subunit                                          | YP_003361396.1   |
| <i>Actinomyces odontolyticus</i>                                                 | Type-2 fimbrial major subunit precursor                   | ABD84025.1       |
| <i>Actinomyces naeslundii</i>                                                    | Fimbrial structural subunit                               | AAC13545.1       |
| <i>Arthrobacter arilaitensis</i> Re117                                           | Putative fimbrial structural subunit                      | CBT74507.1       |
| <i>B. dentium</i> Bd1                                                            | Collagen adhesin precursor                                | YP_003361570.1   |
| <i>Ruminococcus flavefaciens</i> FD-1                                            | Fimbrial subunit <i>fimA</i>                              | ZP_06142946.1    |
| <i>B. bifidum</i> PRL2010                                                        | Fimbrial subunit <i>fimA</i>                              | YP_003970445.1   |
| <i>Bacteroides stercoris</i> ATCC 43183                                          | Major fimbrial subunit protein ( <i>fimA</i> )            | ZP_02436541.1    |
| <i>Bacteroides intestinalis</i> DSM 17393                                        | Major fimbrial subunit protein ( <i>fimA</i> )            | EDV04845.1       |
| <i>Porphyromonas endodontalis</i> ATCC 35406                                     | fimbrillin                                                | EEN83125.1       |
| <i>Odoribacter denticanis</i>                                                    | Fimbrial subunit <i>fimA</i>                              | AAT76446.1       |
| <i>Streptococcus parasanguinis</i>                                               | Adhesin specific for salivary pellicle of dental surfaces | AAA53077.1       |
| <i>Francisella philomiragia</i> subsp. <i>philomiragia</i> ATCC 25017            | Fimbrial subunit <i>fimA</i>                              | ABZ87973.1       |
| <i>Pasteurella multocida</i> subsp. <i>multocida</i> str. <i>Pm70</i>            | Fimbrial subunit <i>fimA</i>                              | AAK03010.1       |
| <i>Bordetella petrii</i>                                                         | Putative fimbrial adhesin                                 | CAP44477         |
| <i>Serratia marcescens</i>                                                       | Fimbrial subunit <i>fimA</i>                              | AAW62392.1       |
| <i>Edwardsiella tarda</i>                                                        | Major fimbrial subunit protein                            | ABK57119.1       |
| <i>Edwardsiella ictaluri</i>                                                     | Putative major fimbrial subunit protein                   | AAT41671.1       |
| <i>Pantoea vagans</i> C9-1                                                       | Type-1 fimbrial protein, A chain precursor                | YP_003933538.1   |
| <i>Salmonella enterica</i> subsp. <i>enterica</i> serovar <i>Typhi</i> str. J185 | Fimbrial protein                                          | ZP_03380023.1    |
| <i>Salmonella enterica</i> subsp. <i>enterica</i> serovar <i>Typhimurium</i>     | Putative fimbrial subunit A                               | AAF21713.1       |
| <i>Enterobacter cloacae</i> subsp. <i>cloacae</i> ATCC 13047                     | P pilus assembly protein, pilin <i>fimA</i>               | ADF59657.1       |
| <i>Yersinia rohdei</i> ATCC 43380                                                | P pilus assembly protein, pilin <i>fimA</i>               | EEQ04210.1       |
| <i>Pseudomonas syringae</i> pv. <i>tomato</i> Max13                              | Type I pilus biogenesis protein <i>fimA</i>               | ZP_07232260.1    |
| <i>Xylella fastidiosa</i> subsp. <i>fastidiosa</i> GB514                         | Fimbrial protein                                          | ADN63049.1       |
| <i>Klebsiella pneumoniae</i> 342                                                 | Type-1 fimbrial protein                                   | ACI10061         |
| <i>Burkholderia multivorans</i> ATCC 17616                                       | Major type 1 subunit fimbrin                              | BAG43555.1       |
| <i>Burkholderia cenocepacia</i> AU 1054                                          | Fimbrial protein                                          | ABF76053.1       |
| <i>Burkholderia mallei</i> ATCC 10399                                            | Fimbrial subunit <i>fimA</i>                              | EDP89455.1       |
| <i>Yersinia aldovae</i> ATCC 35236                                               | Fimbrial protein                                          | EED93769.1       |
| <i>Escherichia coli</i>                                                          | <i>fimA</i> precursor                                     | CAA85727.1       |
| <i>Shigella boydii</i> Sb227                                                     | Major type 1 subunit fimbrin                              | ABB68780.1       |
| <i>Klebsiella pneumoniae</i> subsp. <i>pneumoniae</i> MGH 78578                  | Major type 1 subunit fimbrin (pilin)                      | YP_001336915.1   |
| <i>Klebsiella pneumoniae</i>                                                     | Fimbrial subunit <i>fimA</i>                              | ACV60168.1       |
| <i>Erwinia tasmaniensis</i> Et1/99                                               | Type-1 fimbrial protein, FimA                             | CAO97915.1       |
| <i>Salmonella enterica</i> subsp. <i>enterica</i> serovar <i>Typhi</i> str. Ty2  | Type-1 fimbrial protein subunit A                         | NP_806054.1      |
| <i>Salmonella enterica</i> subsp. <i>indica</i>                                  | Major pilin protein <i>fimA</i>                           | AAD23947.1       |
| <i>Haemophilus ducreyi</i> 35000HP                                               | Fimbrial major pilin protein                              | NP_872871.1      |
| <i>Pectobacterium carotovorum</i> subsp. <i>carotovorum</i> WPP14                | Fimbriae major subunit protein                            | ZP_03832453.1    |
| <i>Yersinia bercovieri</i> ATCC 43970                                            | P pilus assembly protein, pilin FimA                      | EEQ06994.1       |
| <i>Serratia odorifera</i> 4Rx13                                                  | Type-1 fimbrial protein, A chain                          | EDU17402.1       |
| <i>Providencia stuartii</i> ATCC 25827                                           | Pilus assembly protein, pilin <i>fimA</i>                 | EDU57522.1       |
| <i>Yersinia intermedia</i> ATCC 29909                                            | P pilus assembly protein, pilin <i>fimA</i>               | EEQ19614.1       |
| <i>Salmonella enterica</i> subsp. <i>enterica</i> serovar <i>Typhi</i> str. J185 | Fimbrial subunit                                          | ZP_03379271.1    |
| <i>Cronobacter sakazakii</i> ATCC BAA-894                                        | Pilus assembly protein, pilin <i>fimA</i>                 | ABU76251.1       |
| <i>Pseudomonas fluorescens</i> PF-5                                              | Type I pilus biogenesis protein <i>fimA</i>               | AAV90745.1       |
| <i>Pseudomonas aeruginosa</i> PA7                                                | Type I pilus biogenesis protein <i>fimA</i>               | ABR83321.1       |
| <i>Pantoea ananatis</i> LMG 20103                                                | Fimbrial subunit <i>fimA</i>                              | ADD76691.1       |
| <i>Xenorhabdus nematophila</i> ATCC 19061                                        | Putative Fimbrial subunit (pilin)                         | CBJ89795.1       |
| <i>Burkholderia glumae</i> BGR1                                                  | P pilus assembly protein, pilin <i>fimA</i>               | ACR30627.1       |

---

|                                                 |                                             |                |
|-------------------------------------------------|---------------------------------------------|----------------|
| <i>Burkholderia dolosa</i> AUO158               | P pilus assembly protein pilin <i>fimA</i>  | EAY67592.1     |
| <i>Yersinia frederiksenii</i> ATCC 33641        | P pilus assembly protein, pilin <i>fimA</i> | EEQ12942.1     |
| <i>Cupriavidus metallidurans</i> CH34           | Fimbrial protein                            | ABF08548.1     |
| <i>Cupriavidus taiwanensis</i>                  | Major type 1 subunit fimbrin (pilin)        | CAQ72393.1     |
| <i>Bordetella bronchiseptica</i>                | Putative major fimbrial structural subunit  | AAB94076.1     |
| <i>Yersinia bercovieri</i> ATCC 43970           | P pilus assembly protein, pilin <i>FimA</i> | ZP_04627370.1  |
| <i>Pseudomonas putida</i> GB-1                  | Fimbrial protein                            | ABY97371.1     |
| <i>Burkholderia ubonensis</i> Bu                | Type I pilus biogenesis protein <i>FimA</i> | ZP_02379636.1  |
| <i>Pseudomonas aeruginosa</i> PAb1              | Putative fimbrial protein                   | ZP_06881617.1  |
| <i>Yersinia pestis</i> FV-1                     | Fimbrial protein                            | ZP_02332403.1  |
| <i>Haemophilus influenzae</i> PittGG            | Putative F17-like fimbrial subunit          | YP_001293149.1 |
| <i>Yersinia mollaretii</i> ATCC 43969           | P pilus assembly protein, pilin <i>FimA</i> | ZP_04639781.1  |
| <i>Deinococcus radiodurans</i> R1               | Adhesin B                                   | NP_296243.1    |
| <i>Photobacterium profundum</i> 3TCK            | Pilus assembly protein, pilin <i>FimA</i>   | EAS44350.1     |
| <i>Parabacteroides distasonis</i> ATCC 8503     | Putative fimbrilin precursor                | ABR45199.1     |
| <i>Bacteroides eggerthii</i> DSM 20697          | Fimbrial subunit <i>fimA</i>                | EEC55246.1     |
| <i>Bacillus subtilis</i>                        | YcdI                                        | BAA22247.1     |
| <i>Bordetella parapertussis</i>                 | Putative major fimbrial structural subunit  | AAB94079.1     |
| <i>Dichelobacter nodosus</i>                    | Fimbrial subunit AC6                        | AAA23337.1     |
| <i>Ktedonobacter racemifer</i> DSM 44963        | Putative peptidoglycan binding domain       | EFH87082.1     |
| <i>Thermomicrobium roseum</i> DSM 5159          | Major pilin protein <i>fimA</i>             | ACM06830.1     |
| <i>Thermoanaerobacter wiegelii</i> Rt8.B1       | Putative peptidoglycan binding domain       | EFN47949.1     |
| <i>Coprothermobacter proteolyticus</i> DSM 5265 | Major pilin protein <i>fimA</i>             | ACI17737.1     |
| <i>Thermus thermophilus</i> HB27                | Major pilin protein <i>fimA</i>             | AAS81862.1     |
| <i>Providencia rettgeri</i> DSM 1131            | Major pilin protein <i>fimA</i>             | ZP_06125206.1  |
| <i>Bacteroides cellulosilyticus</i> DSM 14838   | Fimbrial subunit <i>fimA</i>                | EEF88619.1     |
| <i>Drosophila fimA</i>                          | amylase                                     | AAC47377.1     |

---
